# Supplementary material for: Understanding the mechanism of CO2 capture by 1,3 di-substituted imidazolium acetate based ionic liquids
Source: Royal Society of Chemistry journal article supplement (doi:10.1039/c5cp05713b), 2015-12-09
Supplement: c5cp05713b1.pdf [file c5cp05713b1.pdf]

# Understanding the Mechanism of CO<sub>2</sub> Capture by 1,3 Di-substituted Imidazolium Acetate Based Ionic Liquids

## Supporting Information

James X. Mao,<sup>†</sup> Janice A. Steckel,<sup>‡</sup> Fangyong Yan,<sup>¶</sup> Nilesh Dhumal,<sup>¶</sup> Hyung  
Kim,<sup>¶</sup> and Krishnan Damodaran<sup>\*,†</sup>

<sup>†</sup>*Department of Chemistry, University of Pittsburgh, Pittsburgh, Pennsylvania 15260*

<sup>‡</sup>*National Energy Technology Laboratory, P.O. Box 10940, Pittsburgh, Pennsylvania 15236*

<sup>¶</sup>*Department of Chemistry, Carnegie Mellon University, Pittsburgh, Pennsylvania 15213*

E-mail: damodak@pitt.edu

Phone: 412-624-8403. Fax: 412-624-8611

## List of Figures

|    |                                                                                                                                                                                                            |   |
|----|------------------------------------------------------------------------------------------------------------------------------------------------------------------------------------------------------------|---|
| S1 | Energy profile for a possible direct reaction between EMIM <sup>+</sup> Ac <sup>-</sup> IL and CO <sub>2</sub>                                                                                             | 3 |
| S2 | Reaction profile of carbene formation and carboxylate for EMIM <sup>+</sup> Ac <sup>-</sup> . . . . .                                                                                                      | 5 |
| S3 | Radial distribution function and integrated coordination number with respect to the center of mass (c.o.m.) of EMIM <sup>+</sup> cation and the center of mass (c.o.m.) of Ac <sup>-</sup> anion . . . . . | 6 |
| S4 | Energy profile for direct reaction between EMIM <sup>+</sup> Ac <sup>-</sup> IL and CO <sub>2</sub> in solvated model . . . . .                                                                            | 6 |
| S5 | Energy profile for the first step of our proposed mechanism between EMIM <sup>+</sup> Ac <sup>-</sup> IL and CO <sub>2</sub> in solvated model . . . . .                                                   | 7 |
| S6 | Energy profile for the second step of our proposed mechanism between EMIM <sup>+</sup> Ac <sup>-</sup> IL and CO <sub>2</sub> in solvated model . . . . .                                                  | 7 |

## List of Tables

|    |                                                                                                                                                                                                                                                                                  |   |
|----|----------------------------------------------------------------------------------------------------------------------------------------------------------------------------------------------------------------------------------------------------------------------------------|---|
| S1 | Calculated energies <sup>a</sup> for species involved in carbene formation and carboxylate steps in Figure S2 at different calculation levels. . . . .                                                                                                                           | 3 |
| S2 | Interactions between different fragments in imidazolium acetate stabilization step, $E_{c-a}$ interactions between cation and anion of imidazolium acetate ILs, and $E_{stab}$ the energy gained from stabilization step at B3LYP/6-31+G(d,p) level. <sup>a,b</sup> . . . . .    | 4 |
| S3 | Interactions between different fragments in imidazolium acetate stabilization step, $E_{c-a}$ interactions between cation and anion of imidazolium acetate ILs, and $E_{stab}$ the energy gained from stabilization step at B3LYP-D3/6-31+G(d,p) level. <sup>a,b</sup> . . . . . | 4 |
| S4 | Calculated reaction energy changes <sup>a</sup> for Emim <sup>+</sup> Ac <sup>-</sup> → Carbene+HAc in solvated model by ONIOM and QM methods. . . . .                                                                                                                           | 4 |

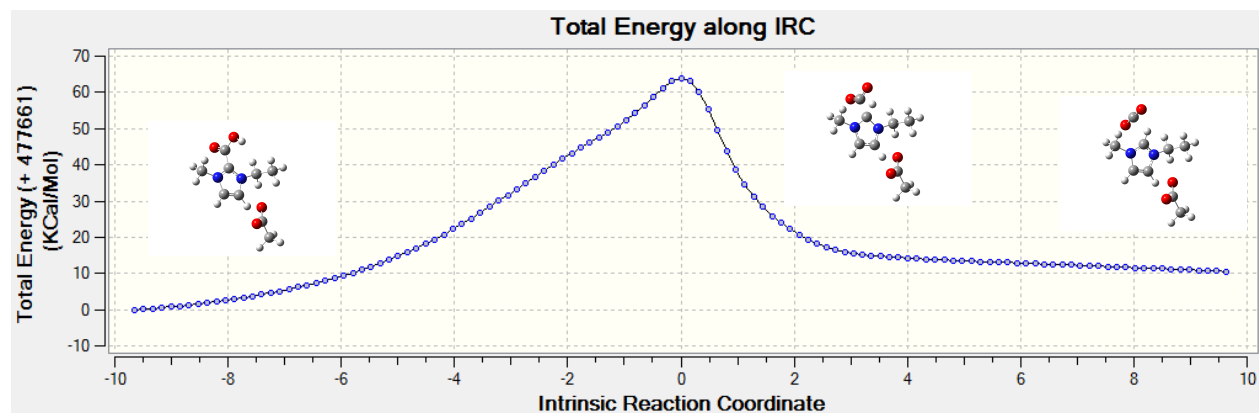

Figure S1: Energy profile for a possible direct reaction between EMIM<sup>+</sup>Ac<sup>-</sup> IL and CO<sub>2</sub>. The energy barrier is about 267 kJ/mol.

Table S1: Calculated energies <sup>a</sup> for species involved in carbene formation and carboxylate steps in Figure S2 at different calculation levels.

| Species                | Relative Energies |              |                  |
|------------------------|-------------------|--------------|------------------|
|                        | B3LYP/6-31+G(d,p) | PBE0/cc-PVTZ | PCM <sup>b</sup> |
| I + CO <sub>2</sub>    | 0                 | 0            | 0                |
| TS-I + CO <sub>2</sub> | 7.9               | 1.9          | 34.4             |
| II + CO <sub>2</sub>   | 4.5               | -3.3         | 40.3             |
| III + HAc              | 53.7              | 47.2         | 84.5             |
| TS-II + HAc            | 60.4              | 54.8         | 91               |
| IV + HAc               | 18.5              | 10.9         | 11.5             |

<sup>a</sup> Energies in unit of kJ/mol. <sup>b</sup> With a dielectric constant of 30.

Table S2: Interactions between different fragments in imidazolium acetate stabilization step,  $E_{c-a}$  interactions between cation and anion of imidazolium acetate ILs, and  $E_{stab}$  the energy gained from stabilization step at B3LYP/6-31+G(d,p) level. <sup>a,b</sup>

| Ionic liquids                     | Interactions |                                   |                         | $E_{c-a}$ | $E_{stab}$ |
|-----------------------------------|--------------|-----------------------------------|-------------------------|-----------|------------|
|                                   | $E_{int}$    | EMIM <sup>+</sup> ··· Carboxylate | Ac <sup>-</sup> ··· HAc |           |            |
| DMIM <sup>+</sup> Ac <sup>-</sup> | -605.8       | -137.8                            | -174.9                  | -431.9    | -173.9     |
| EMIM <sup>+</sup> Ac <sup>-</sup> | -598.6       | -134.0                            | -173.8                  | -426.4    | -172.2     |
| PMIM <sup>+</sup> Ac <sup>-</sup> | -595.0       | -132.0                            | -173.7                  | -423.9    | -171.1     |
| BMIM <sup>+</sup> Ac <sup>-</sup> | -592.6       | -131.4                            | -172.8                  | -422.3    | -170.3     |
| EEIM <sup>+</sup> Ac <sup>-</sup> | -589.7       | -128.9                            | -174.1                  | -420.7    | -169.0     |

<sup>a</sup> Energy in unit of kJ/mol. <sup>b</sup> BSSE correction is considered.

Table S3: Interactions between different fragments in imidazolium acetate stabilization step,  $E_{c-a}$  interactions between cation and anion of imidazolium acetate ILs, and  $E_{stab}$  the energy gained from stabilization step at B3LYP-D3/6-31+G(d,p) level. <sup>a,b</sup>

| Ionic liquids                     | Interactions |                                   |                         | $E_{c-a}$ | $E_{stab}$ |
|-----------------------------------|--------------|-----------------------------------|-------------------------|-----------|------------|
|                                   | $E_{int}$    | EMIM <sup>+</sup> ··· Carboxylate | Ac <sup>-</sup> ··· HAc |           |            |
| DMIM <sup>+</sup> Ac <sup>-</sup> | -643.2       | -152.0                            | -177.7                  | -445.1    | -198.1     |
| EMIM <sup>+</sup> Ac <sup>-</sup> | -624.7       | -150.4                            | -173.1                  | -440.1    | -184.6     |
| PMIM <sup>+</sup> Ac <sup>-</sup> | -622.7       | -149.2                            | -173.0                  | -438.0    | -184.7     |
| BMIM <sup>+</sup> Ac <sup>-</sup> | -629.2       | -150.0                            | -176.3                  | -436.6    | -192.6     |
| EEIM <sup>+</sup> Ac <sup>-</sup> | -620.8       | -147.2                            | -173.0                  | -435.4    | -185.4     |

<sup>a</sup> Energy in unit of kJ/mol. <sup>b</sup> BSSE correction is considered.

Table S4: Calculated reaction energy changes <sup>a</sup> for Emim<sup>+</sup>Ac<sup>-</sup> → Carbene+HAc in solvated model by ONIOM and QM methods.

| ONIOM and<br>QM Methods                         | Energy Change |      |      |       |       |      |       |       | Average |
|-------------------------------------------------|---------------|------|------|-------|-------|------|-------|-------|---------|
|                                                 | 1             | 2    | 3    | 4     | 5     | 6    | 7     | 8     |         |
| PBE0/cc-pVTZ:UFF                                | -11.9         | -5.1 | 0.2  | -0.8  | 0.5   | -0.3 | -0.1  | -1    | 2.3     |
| PBE0/cc-pVTZ:UFF <sub>E</sub> <sup>b</sup>      | -14.9         | -6.0 | 5.9  | -11.5 | -14.5 | -4.0 | -11.9 | -11   | -8.5    |
| PBE0/cc-pVTZ:Dreiding                           | -9.5          | -4.6 | 2.2  | -1.3  | 0.4   | 1.4  | -0.4  | -1.5  | -1.7    |
| PBE0/cc-pVTZ:Dreiding <sub>E</sub> <sup>b</sup> | -12.5         | -5.5 | 7.9  | -12.0 | -14.6 | -2.3 | -12.2 | -11.5 | -7.8    |
| PBE0/cc-pVTZ:RHF/STO-3G                         | 112.5         | 71.2 | 67.3 | 12.3  | 27.5  | 6.1  | 28.3  | 8.9   | 41.8    |
| PBE0/cc-pVTZ:RHF/3-21G                          | 91.6          | 56.0 | 57.2 | 9.8   | 12.8  | 6.1  | 19.9  | 8.2   | 32.7    |
| PBE0/6-31+G(d,p)                                | 78.4          | 53.5 | 57.1 | 12.3  | 19.4  | 4.3  | 21.8  | 10.2  | 32.1    |

<sup>a</sup> Energy in unit of kJ/mol. <sup>b</sup> Subscript E donates electronic embedding.

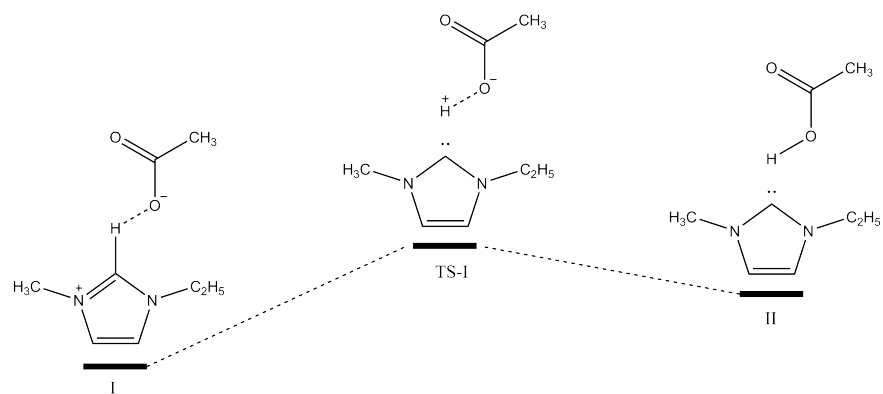

(a) carbene formation step

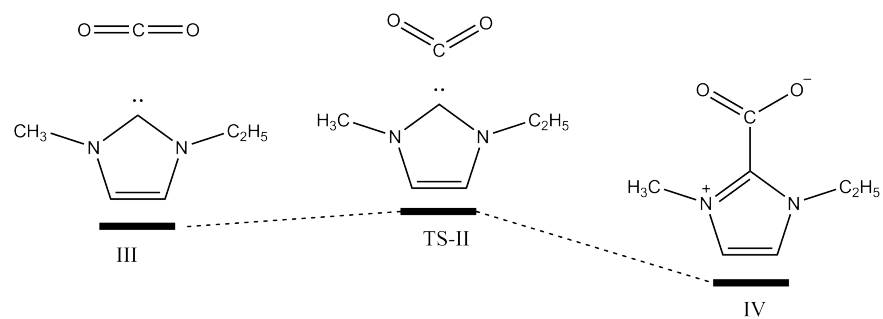

(b) carboxylate step

Figure S2: Reaction profile of carbene formation and carboxylate for EMIM<sup>+</sup>Ac<sup>-</sup>. Detailed data are listed in Table S1.

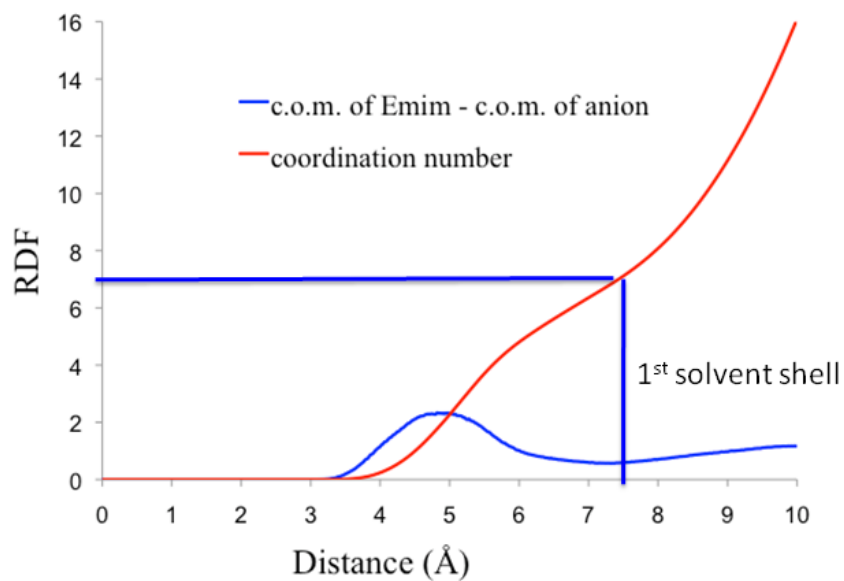

Figure S3: Radial distribution function (blue line) and integrated coordination number (red line) with respect to the center of mass (c.o.m.) of EMIM<sup>+</sup> cation and the center of mass (c.o.m.) of Ac<sup>-</sup> anion. The first solvent shell is at a distance of  $\sim 7.5\text{\AA}$ , with a coordination number of 7.

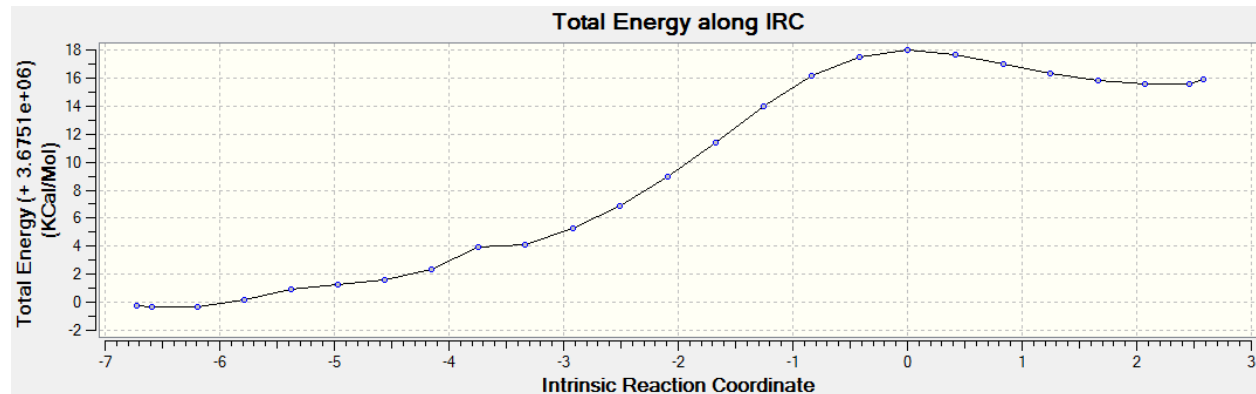

Figure S4: Energy profile for direct reaction between EMIM<sup>+</sup>Ac<sup>-</sup> IL and CO<sub>2</sub> in solvated model. The energy barrier is about 96.6 kJ/mol.

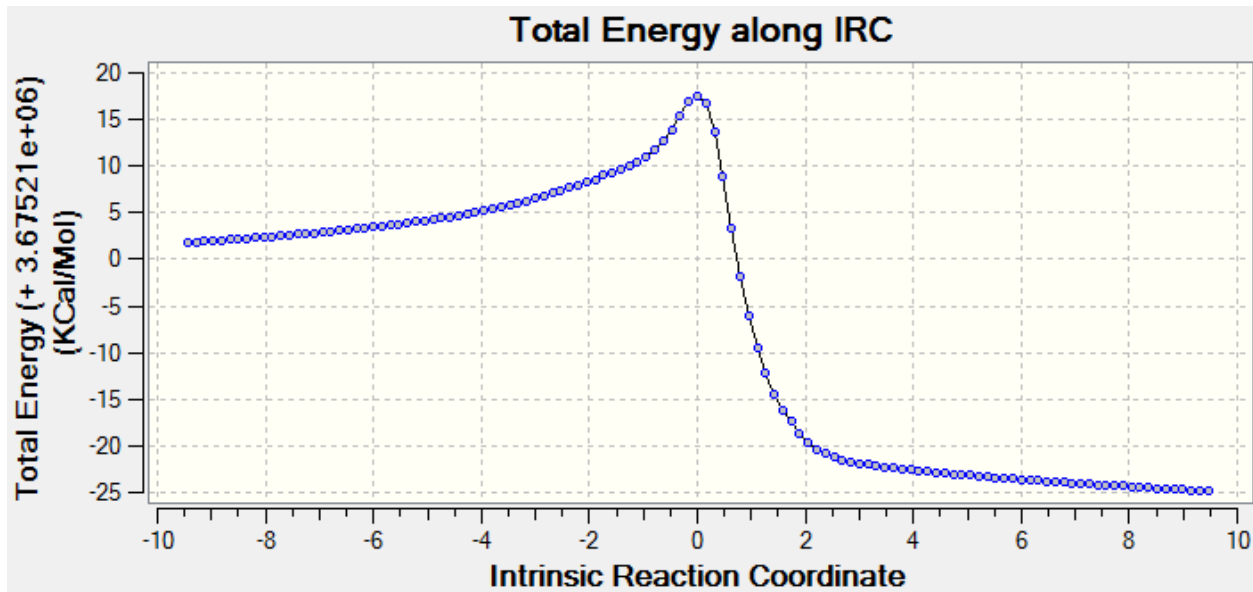

Figure S5: Energy profile for the first step of our proposed mechanism between  $\text{EMIM}^+\text{Ac}^-$  IL and  $\text{CO}_2$  in solvated model. The energy barrier is about 66.1 kJ/mol.

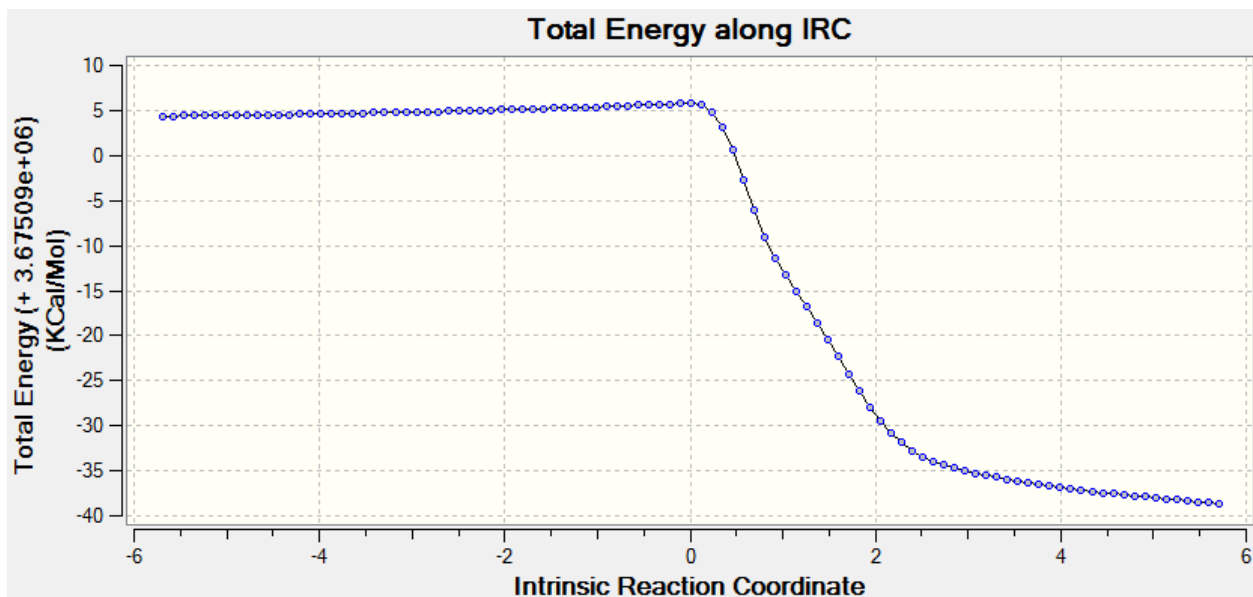

Figure S6: Energy profile for the second step of our proposed mechanism between  $\text{EMIM}^+\text{Ac}^-$  IL and  $\text{CO}_2$  in solvated model. The energy barrier is about 6.0 kJ/mol.
